# Supplementary material for: Reporter Assay for Endo/Lysosomal Escape of Toxin-Based Therapeutics
Source: MDPI journal article supplement (doi:10.3390/toxins6051644), 2014-05-22
Supplement: s1 [file s1]

Supplementary information

**Figure S1.** Purification of saporin by Ni-NTA chromatography. Proteins were eluted with increasing concentrations of imidazole (31, 62, 125 and 250 mM). The flow-through, wash and all elution fractions were analyzed by SDS-PAGE. Saporin was eluted from Fraction 1 at 62 mM to Fraction 5 at 125 mM imidazole. Fractions comprising of only saporin but no or minor amount of co-purified proteins [Fractions 3–5 (62 mM) and Fractions 1–5 (125 mM)] were used for the further experiments.

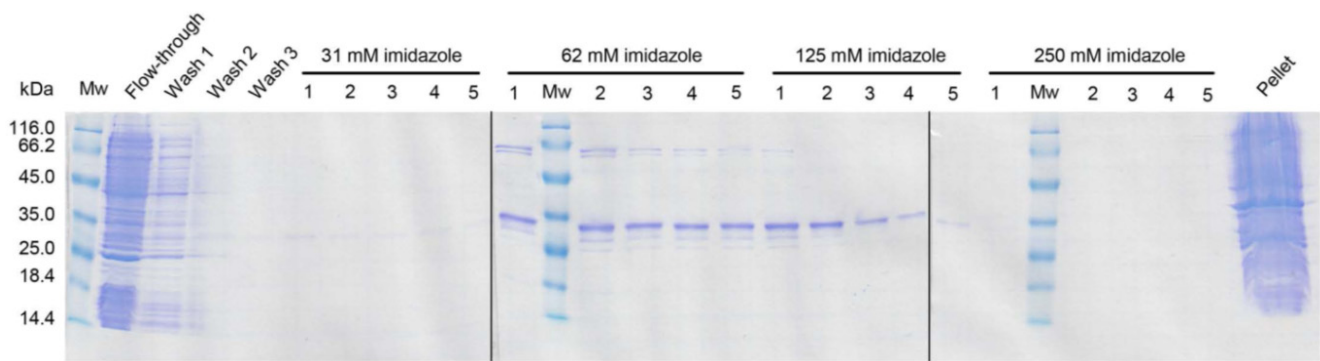

**Figure S2.** Purification and identity validation of the enzymatically inactive variant of saporin (saporin-KQ). (A) Purification of saporin-KQ by Ni-NTA chromatography. Elution fractions at 31, 62, 125 and 250 mM imidazole were assessed by SDS-PAGE. Saporin-KQ was eluted from Fraction 2 at 62 mM to Fraction 3 at 125 mM imidazole. Fractions comprising of only saporin-KQ but no or minor amount of co-purified proteins [Fractions 2–3 (125 mM)] were used for the further experiments; (B) Identity validation of saporin-KQ. Firstly, saporin-KQ (fraction from Ni-NTA chromatography with co-purified proteins) was analyzed by SDS-PAGE. Saporin and a pellet of the bacteria that had previously expressed saporin-KQ were simultaneously analyzed as controls. Secondly, saporin-KQ was analyzed by Western blot with a primary polyclonal antibody against saporin. Saporin-KQ, as well as saporin and saporin-KQ in the bacterial pellet, were specifically detected.

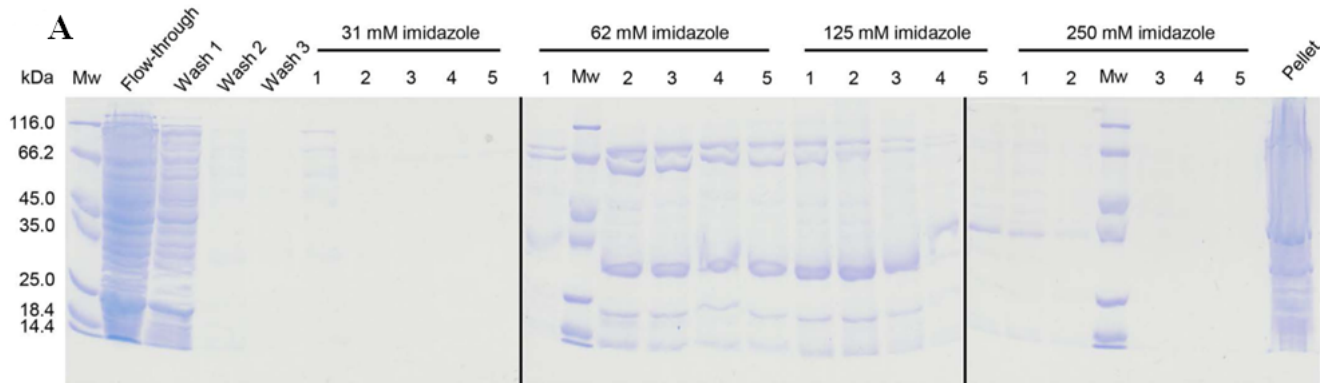

Figure S2. Cont.

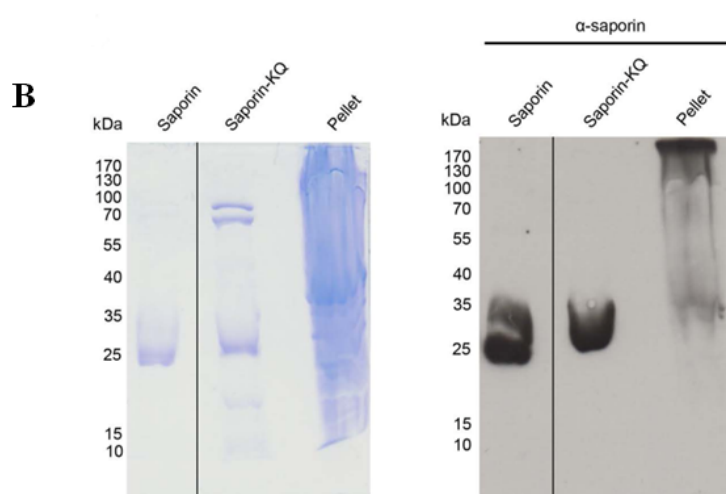

**Video S1.** Alexa Fluor 488 as a reporter for endo/lysosomal escape in live cell imaging. The same results presented in Figure 3 are shown here in video format. The video comprises all the fluorescence images acquired during the whole experiment (from  $t = 0$  s to  $t = 3700$  s).
