# Supplementary material for: Reporter Assay for Endo/Lysosomal Escape of Toxin-Based Therapeutics
Source: Toxins (Basel). 2014 May 22;6(5):1644–66. doi: 10.3390/toxins6051644 (PMC4052257; doi:10.3390/toxins6051644)
Supplement: Supplementary File 1 — Supplementary Information (ZIP, 17084 KB) [file toxins-06-01644-s001.zip]

Archive with 2 entries (2 files):
- toxins-53644-Supplementary.pdf
- Video S1.wmv
